# Supplementary material
Source: Springer Nature journal article supplement (https://www.springermedizin.de/resource/supplementary/12936_2011_1920_MOESM4_ESM.pdf/9542038)

General Items (n=61)

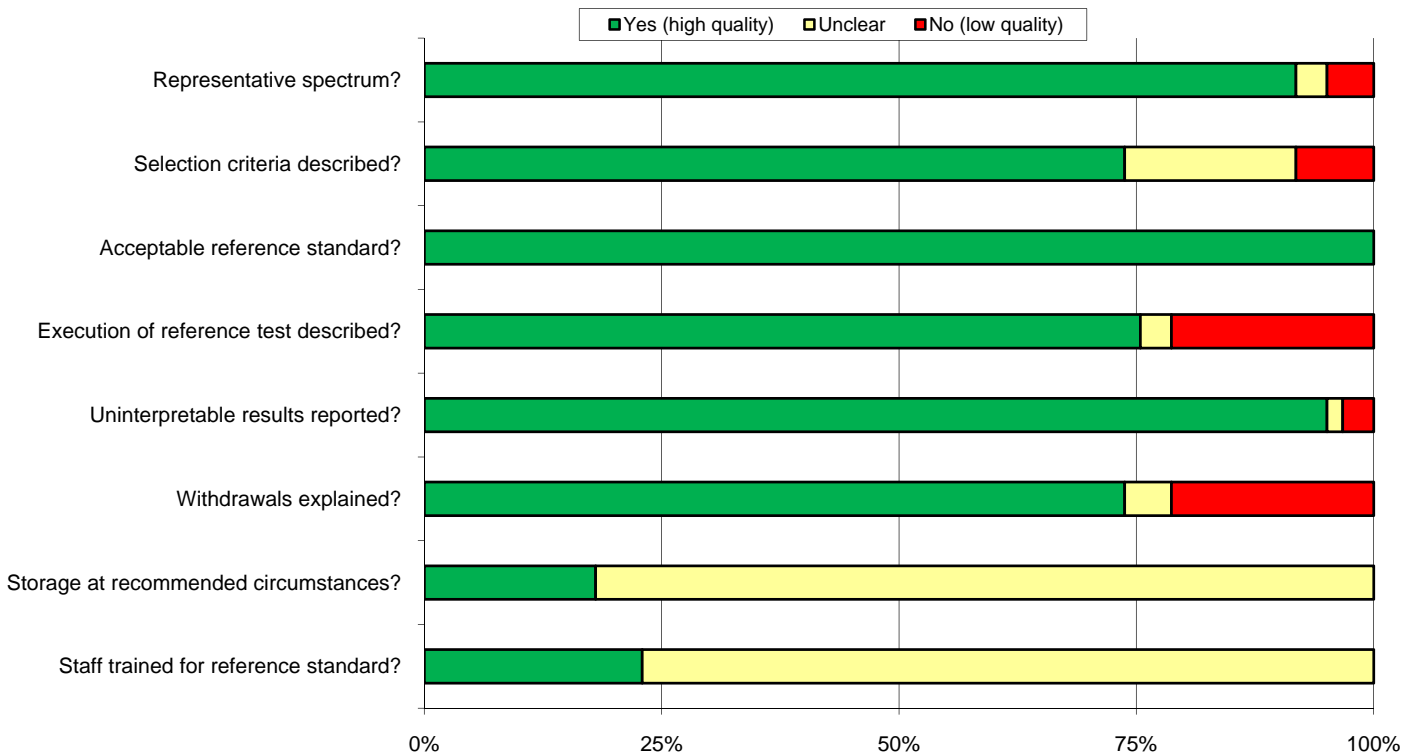

Index & comparator test items (n=108)

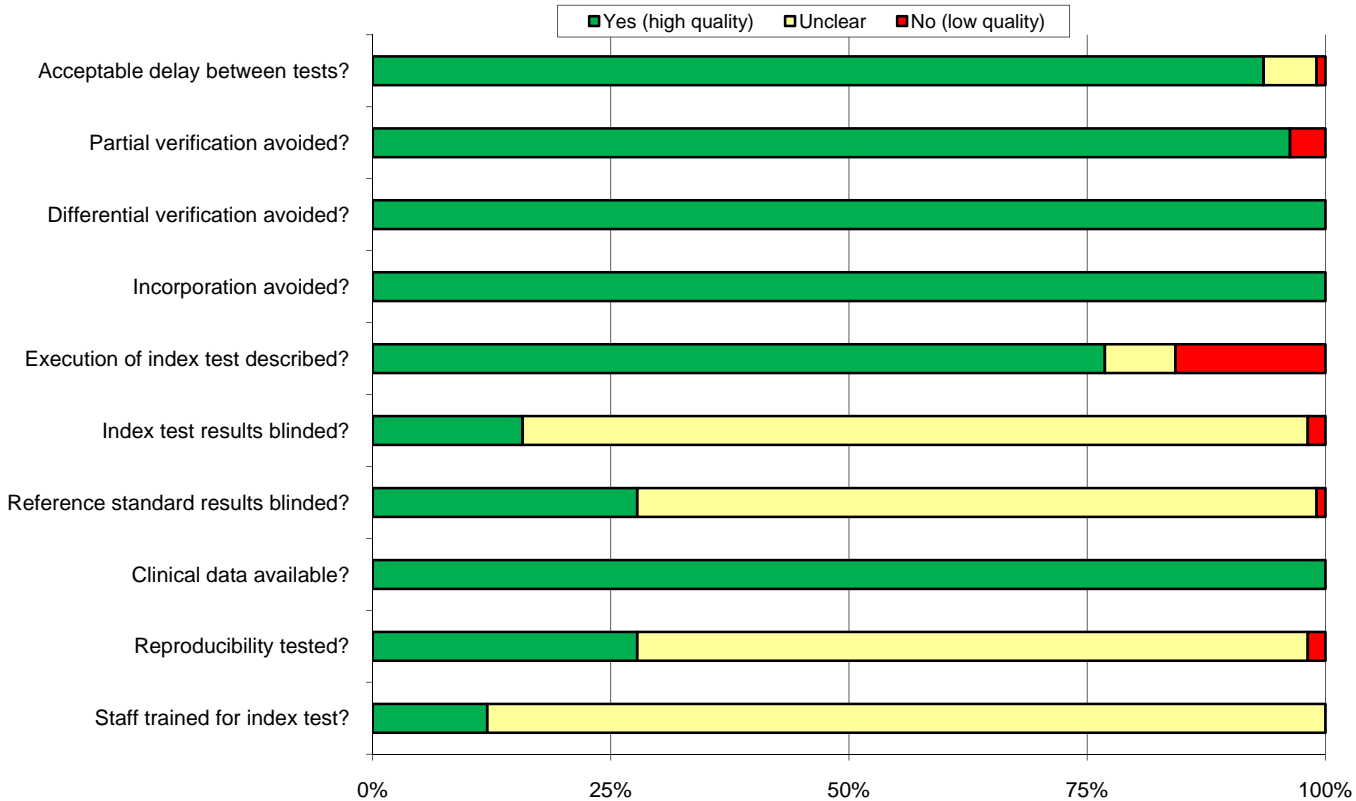

Supplement: MOESM4 [file 9542038]
